# Supplementary material for: Locoregional Confinement and Major Clinical Benefit of 188Re-Loaded CXCR4-Targeted Nanocarriers in an Orthotopic Human to Mouse Model of Glioblastoma
Source: PubMed Central journal article supplement — Theranostics. 2017 Oct 12;7(18):4517–36. doi: 10.7150/thno.19403 (PMC5695146; doi:10.7150/thno.19403), 2017-10-12

Supplemental Figure S1: Analysis of immunoreactivity of free 12G5 antibody and 12G5-LNCs as a function of time after storage at 4°C determined by flow cytometry on U87MG transfected cells. The free 12G5 antibody and 12G5-LNCs labeled U87MG CXCR4+ cells. 12G5-LNCs labeling remains stable for 3 days. Statistical analysis was performed with the log-rank test (\*  $p < 0.05$ ; \*\*  $p < 0.001$ ).

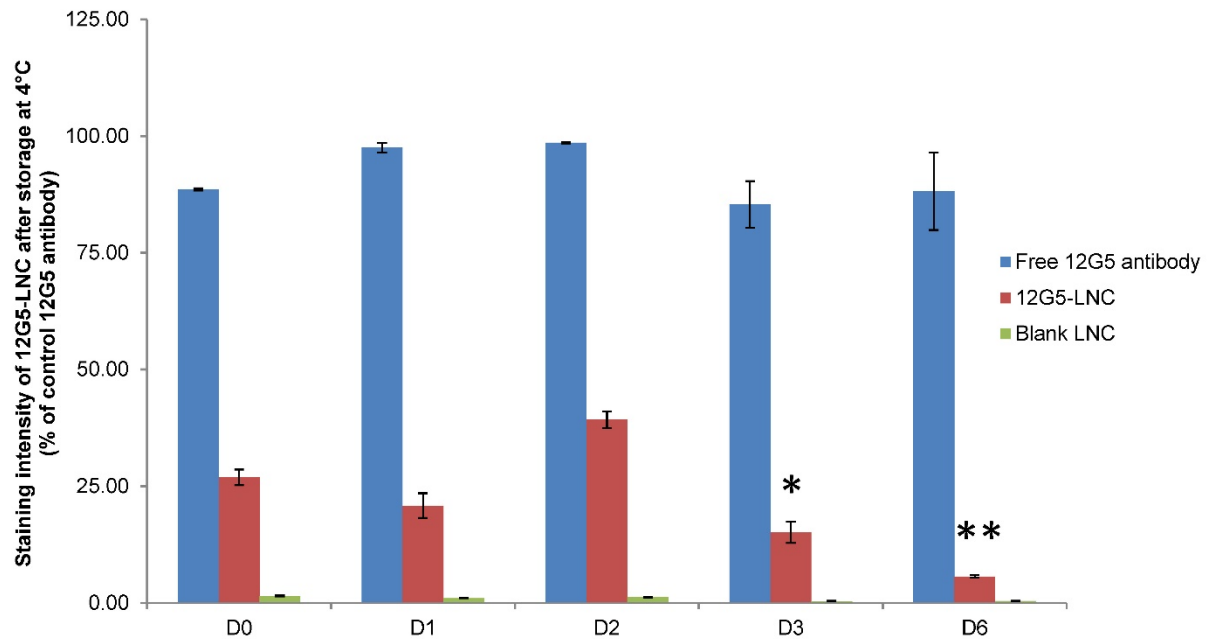

Supplemental Figure S2: Western blot analysis of the phosphorylation of Akt in U87MG CXCR4+ cells 16 hours after stimulation by SDF-1 at 25nM depending from the presence of LNC formulations (12G5-LNC, IgG2a-LNCs and LNCs) or not (PBS).

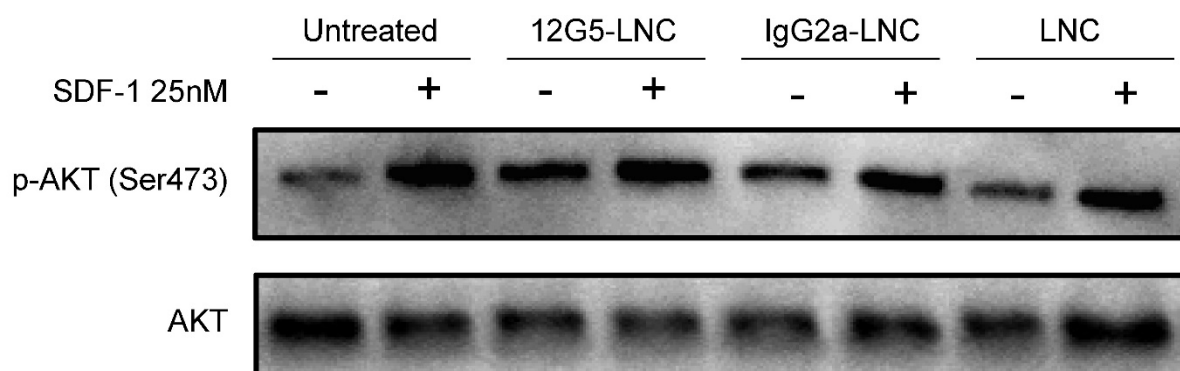

Supplement: thnov07p4517s1.pdf [file thnov07p4517s1.pdf]
